# Supplementary material
Source: HighWire-hosted journal article supplement (https://heart.bmj.com/content/108/3/219)
Supplement: inline-supplementary-material-1 [file inline-supplementary-material-1.pdf]

Supplemental table 1: ICD-10 codes used to identify causes of readmission

|                                 |                                                                                                                                                                                                                                                                                                                                                                                                                                       |
|---------------------------------|---------------------------------------------------------------------------------------------------------------------------------------------------------------------------------------------------------------------------------------------------------------------------------------------------------------------------------------------------------------------------------------------------------------------------------------|
| <b>Major cardiac causes</b>     |                                                                                                                                                                                                                                                                                                                                                                                                                                       |
| Heart failure                   | I5021, I5023, I5031, I5033, I5041, I5043, I50811, I50813                                                                                                                                                                                                                                                                                                                                                                              |
| Arrhythmia                      | I47x, I48x, I49x                                                                                                                                                                                                                                                                                                                                                                                                                      |
| Conduction disorders            | I44x, I45x                                                                                                                                                                                                                                                                                                                                                                                                                            |
| Ischemic heart disease          | I20x, I21x, I22x, I23x, I24x, I25x                                                                                                                                                                                                                                                                                                                                                                                                    |
| Myocardial infarction           | I2102, I2121, I2101, I2111, I2109, I2119, I2129, I213, I214                                                                                                                                                                                                                                                                                                                                                                           |
| Bioprosthetic valve failure     | Q230, Q231                                                                                                                                                                                                                                                                                                                                                                                                                            |
| Endocarditis                    | I30x, I31x, I32x                                                                                                                                                                                                                                                                                                                                                                                                                      |
| Aortic valve reintervention     | 02RF3, 02RF0, 02RF4                                                                                                                                                                                                                                                                                                                                                                                                                   |
| <b>Major non-cardiac causes</b> |                                                                                                                                                                                                                                                                                                                                                                                                                                       |
| Infection                       | Ax, Bx, J0x, J1x, J2x, J85x, J86x, N30x, N390x, N10x                                                                                                                                                                                                                                                                                                                                                                                  |
| Stroke                          | I63012, I6302, I63031, I63031, I63032, I6310, I63111, I63112, I6312, I63131, I63132, I6319, I6320, I63211, I63212, I6322, I63231, I63232, I6329, I63311, I63312, I63319, I63321, I63322, I63331, I63332, I63341, I6339, I6340, I63411, I63412, I63419, I63422, I63431, I63432, I63441, I63442, I63449, I6350, I63511, I63512, I63519, I63521, I63522, I63529, I63531, I63532, I63539, I63541, I63542, I63549, I6359, I636, I638, I639 |
| Acute kidney injury             | N170, N171, N172, N178, N179                                                                                                                                                                                                                                                                                                                                                                                                          |
| Peripheral vascular disease     | I7x, I8x                                                                                                                                                                                                                                                                                                                                                                                                                              |
| Neoplasm                        | Cx, D0x, D1x, D2x, D3x, D4x                                                                                                                                                                                                                                                                                                                                                                                                           |
| Respiratory illness             | Jx                                                                                                                                                                                                                                                                                                                                                                                                                                    |
| Fall and trauma                 | Sx, Tx, Vx, Wx, Xx, Yx,                                                                                                                                                                                                                                                                                                                                                                                                               |

|                           |                    |
|---------------------------|--------------------|
| Dermatological disorder   | Lx                 |
| Head and neck disorders   | Hx                 |
| Mental disorders          | Fx                 |
| Blood disorders           | D5x, D6x, D7x, D8x |
| Genitourinary disorder    | Nx                 |
| Gastrointestinal disorder | Kx                 |
