# Supplementary material
Source: HighWire-hosted journal article supplement (https://heart.bmj.com/content/108/3/219)
Supplement: inline-supplementary-material-6 [file inline-supplementary-material-6.pdf]

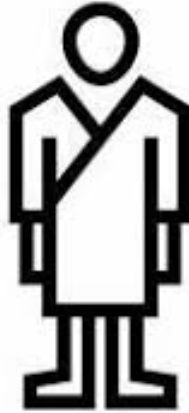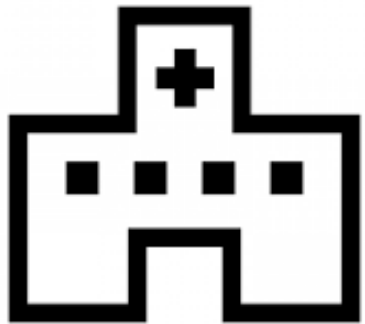

**Hospital A**

There is a **22%** difference in risk of thirty-day readmission between two random hospitals after transcatheter aortic valve implantation

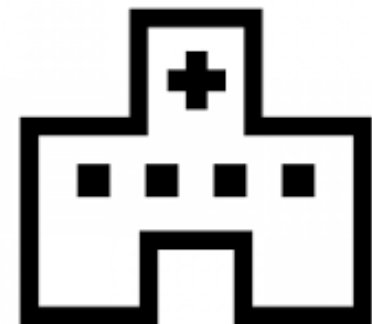

**Hospital B**
