# Supplementary material
Source: HighWire-hosted journal article supplement (https://heart.bmj.com/content/108/3/219)

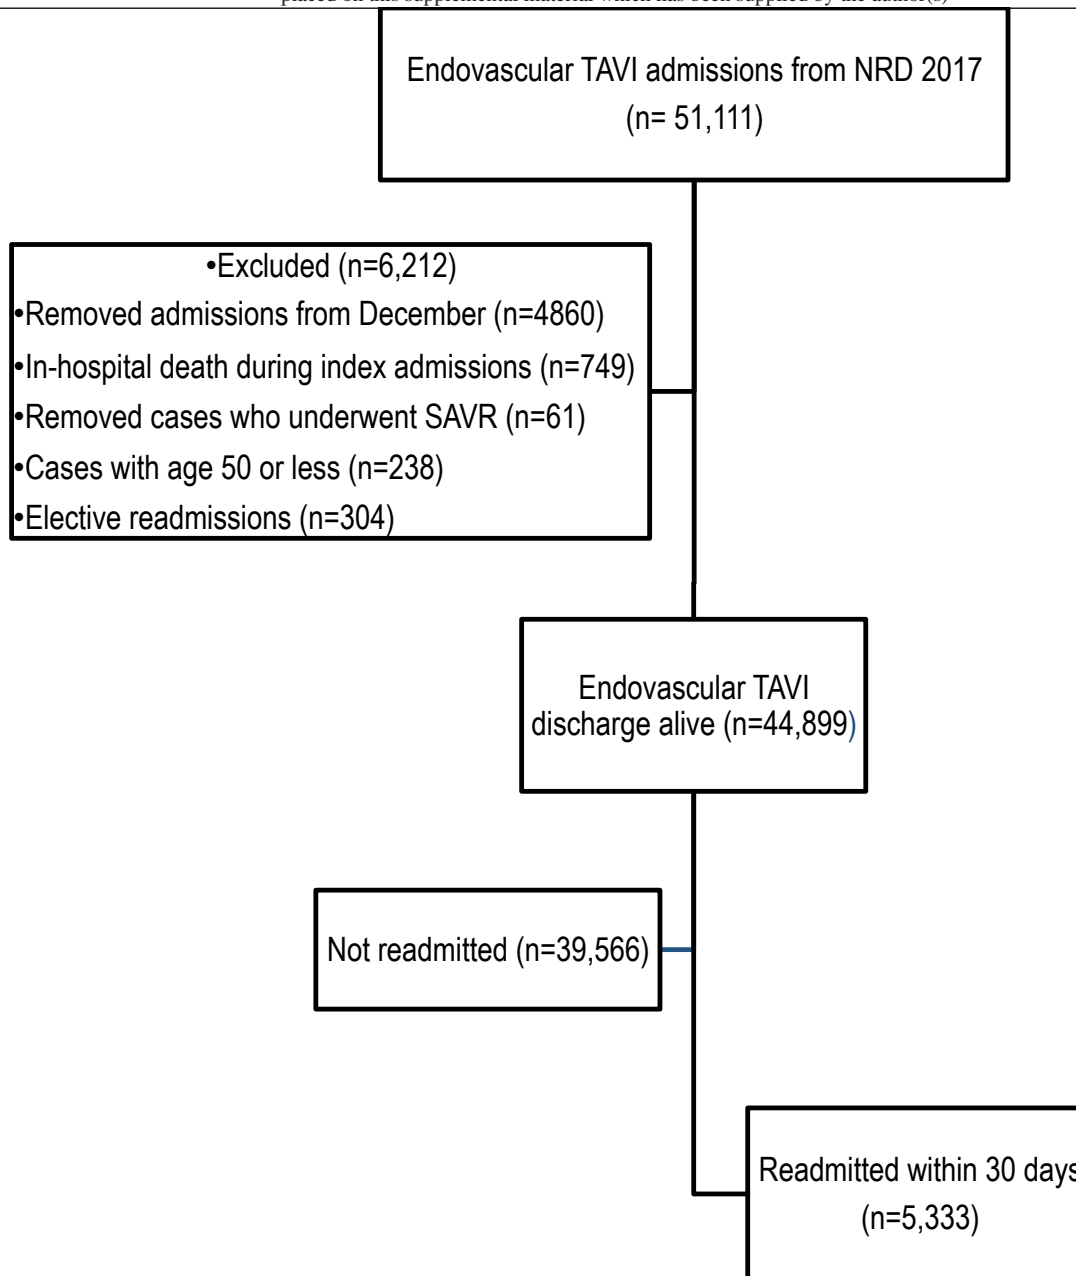

Supplement: inline-supplementary-material-2 [file inline-supplementary-material-2.pdf]

## Supplemental figure 2A

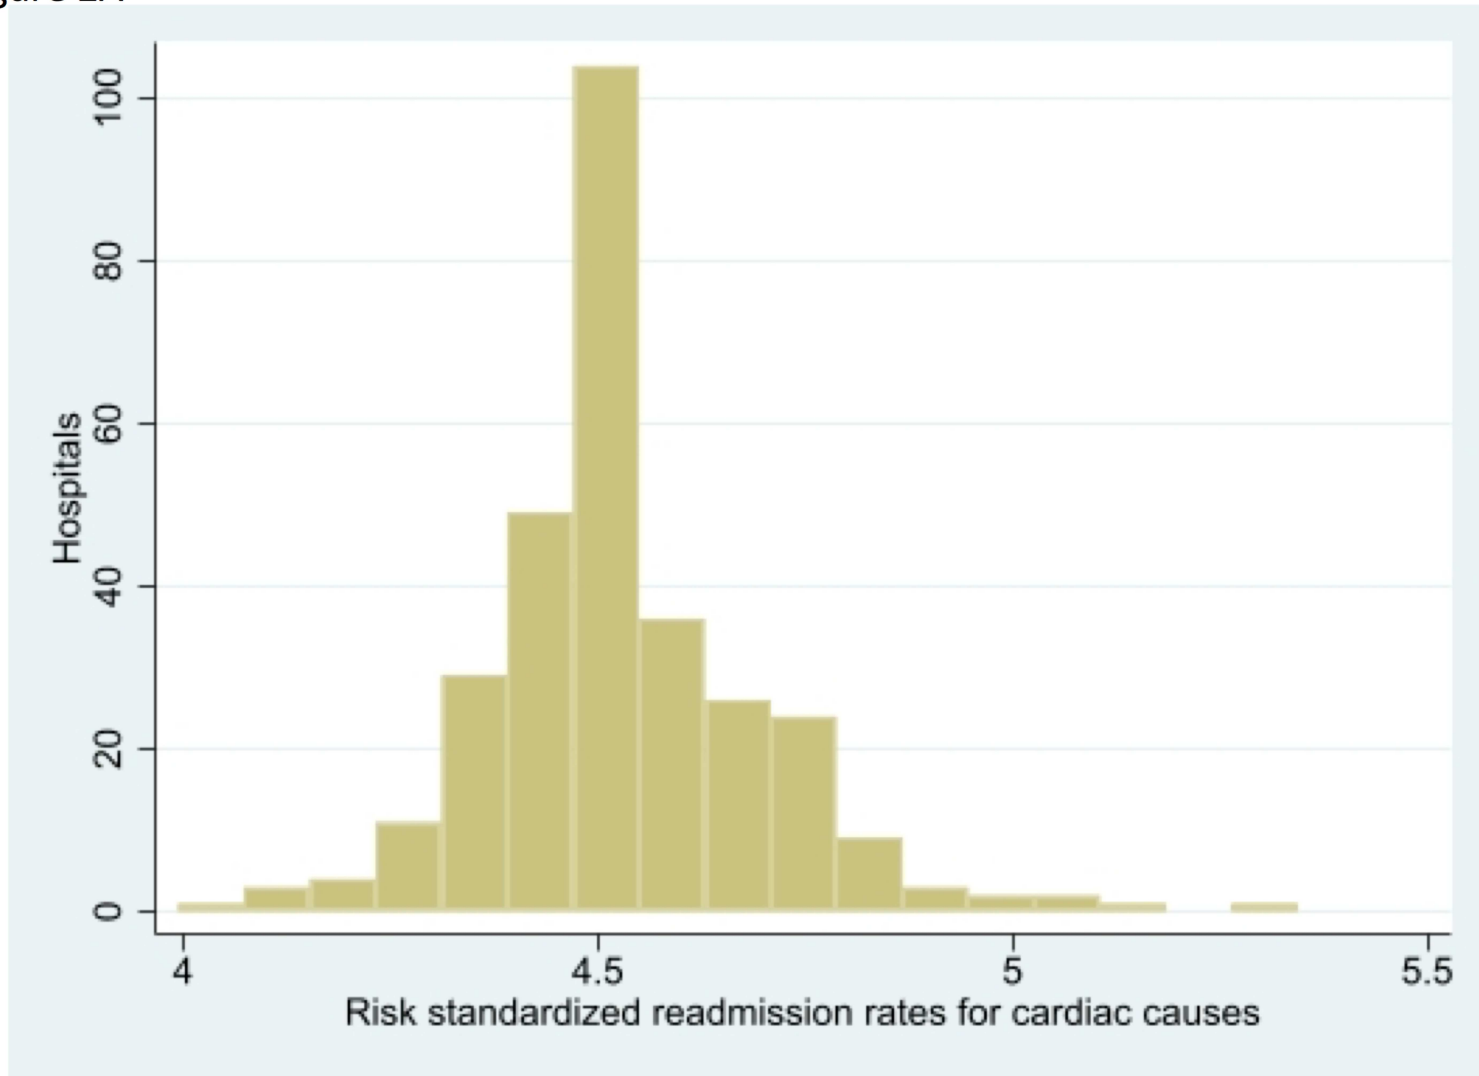

Supplement: inline-supplementary-material-3 [file inline-supplementary-material-3.pdf]

## Supplemental figure 3

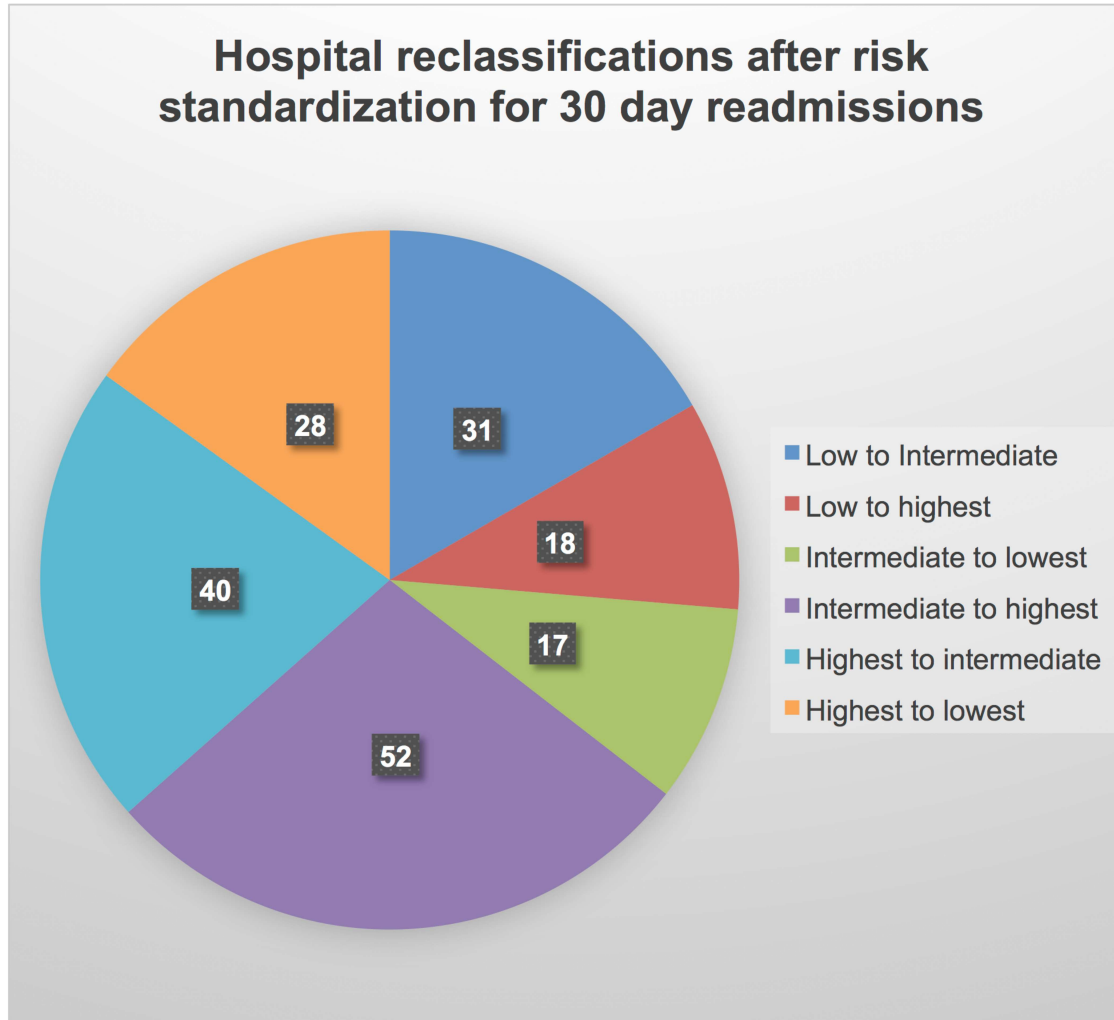

Supplement: inline-supplementary-material-5 [file inline-supplementary-material-5.pdf]
